# Supplementary material for: Mechanistic exploration of syngas conversion at the interface of graphene/Cu(111): identifying the effect of promoted electron transfer on the product selectivity
Source: Royal Society of Chemistry journal article supplement (doi:10.1039/d3cy01184d), 2023-01-01
Supplement: d3cy01184d1.pdf [file d3cy01184d1.pdf]

## Supplementary Material

### Mechanistic exploration of syngas conversion at the interface of graphene/Cu(111): Identifying the effect of promoted electron transfer on the product selectivity

Zhongzeng Wei,<sup>a,#</sup> Bing Bai,<sup>a,#</sup> Hui Bai,<sup>a\*</sup> Yongliang Duan,<sup>b</sup> Mingxue Yang,<sup>a</sup> Haojie Cao,<sup>a</sup> Zhijun Zuo,<sup>a</sup> Jianping Zuo,<sup>c</sup> Qiang Wang,<sup>d</sup> Wei Huang<sup>a\*</sup>

*a. State Key Laboratory of Clean and Efficient Coal Utilization, college of chemical engineering and technology, Taiyuan University of Technology, Taiyuan 030024, Shanxi, China*

*b. National Energy Ningxia Coal Industry Group Coal Chemical Industry Technology Research Institute, Yinchuan 750411, Ningxia, China*

*c. School of Mechanics and Civil Engineering, China University of Mining and Technology, Beijing 100083, China*

*d. National Key Laboratory of High Efficiency and Low Carbon Utilization of Coal, Institute of Coal Chemistry, Chinese Academy of Sciences, Taiyuan 030001, China*

#### Corresponding authors:

Email: baihui@tyut.edu.cn; huangwei@tyut.edu.cn

# These authors contributed equally to this work.

### The details of the thermodynamic corrections

The shomate gas equation[1] was used for the free energy correction of gaseous species:

$$G(T) = H(T) - TS(T) \quad (a)$$

$$H(T) = E_{elec} + E_{ZPE} + \int C_p dT \quad (b)$$

$$E_{ZPE} = \frac{1}{2} \sum h_i \omega_i \quad (c)$$

$$C_p = A + B \times t + C \times t^2 + D \times t^3 - \frac{E}{t^2} \quad (d)$$

$$S = A \times \ln(t) + B \times t + \frac{C \times t^2}{2} + \frac{D \times t^3}{3} - \frac{E}{2 \times t^2} + G \quad (e)$$

where  $E_{elec}$  is the DFT energy,  $E_{ZPE}$  is the zero point energy, the parameter from A to G for different gas species can be obtained from the National Institute of Standards and Technology (NIST) website.

The harmonic approximation method was used to calculate the Gibbs free energy of adsorbates[2]:

$$G(T) = H(T) - TS(T) \quad (f)$$

$$H(T) = E_{elec} + E_{ZPE} + \sum \frac{\varepsilon_i}{e^{\varepsilon_i/k_B} - 1} \quad (g)$$

$$\varepsilon_i = h\omega_i \quad (h)$$

where  $\varepsilon_i$  is harmonic energy,  $\omega_i$  is angular frequency,  $k_B$  is Boltzmann constant,  $T$  is reaction temperature, and  $h$  is plank constant. The entropy of the surface intermediate was calculated by the following equation:

$$S(T) = k_B \sum_i^{harmDOF} \frac{\varepsilon_i}{k_B T (e^{\varepsilon_i/k_B} - 1)} - \ln(1 - e^{-\varepsilon_i/k_B}) \quad (i)$$

**Fig. S1** Top and side view of the most stable adsorption configurations of possible species involved in syngas conversion at the graphene/Cu(111) interface.

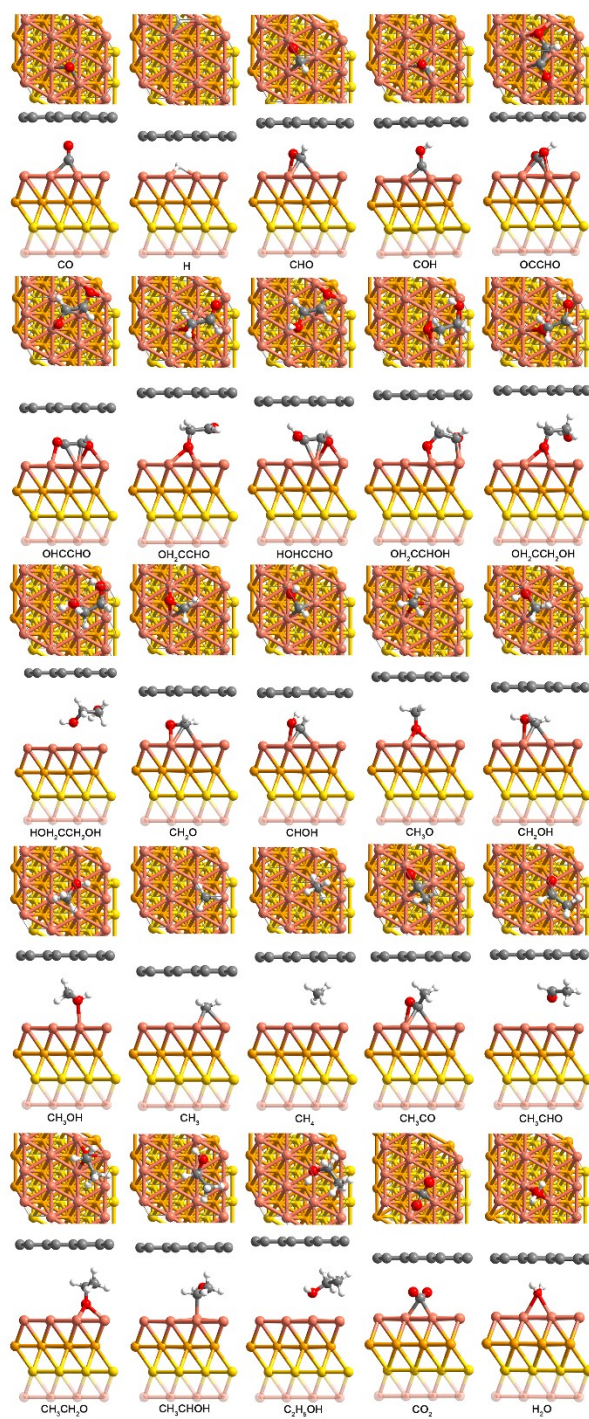

**Table S1** Adsorption energy (eV) and key geometrical parameters (Å) of reactants, possible intermediates and products involved in syngas conversion at the graphene/Cu(111) interface.

|    | Species                              | $E_{\text{ads}}/\text{eV}$                               | Configuration            | $d_{\text{graphene/Cu}}/\text{Å}$ | Key parameters/Å                                                                                                 |
|----|--------------------------------------|----------------------------------------------------------|--------------------------|-----------------------------------|------------------------------------------------------------------------------------------------------------------|
| 1  | H                                    | -3.68 (-2.43 <sup>ref50</sup> , -3.77 <sup>ref51</sup> ) | fcc <i>via</i> H         | 3.334                             | Cu - H: 1.728                                                                                                    |
| 2  | CO                                   | -0.03 (-0.86 <sup>ref50</sup> , -1.09 <sup>ref51</sup> ) | hcp <i>via</i> C         | 4.802                             | Cu - C: 1.987                                                                                                    |
| 3  | CHO                                  | -1.24 (-1.18 <sup>ref50</sup> , -1.99 <sup>ref51</sup> ) | fcc <i>via</i> bridge-CO | 4.381                             | Cu - C: 2.023; Cu-O: 2.045                                                                                       |
| 4  | COH                                  | -2.64 (-2.57 <sup>ref50</sup> , -3.77 <sup>ref51</sup> ) | hcp <i>via</i> C         | 4.886                             | Cu - C: 1.916                                                                                                    |
| 5  | OCCHO                                | -0.84                                                    | bridge-OCCO              | 4.945                             | Cu - C(HO): 2.163; Cu - C(O): 2.067<br>Cu - O(HO):2.132; Cu - O(O):2.071                                         |
| 6  | OHCCHO                               | -0.14                                                    | bridge-OCCO              | 4.858                             | Cu - C <sub>I</sub> : 2.269; Cu - C <sub>II</sub> : 2.118<br>Cu-O <sub>I</sub> :2.029; Cu-O <sub>II</sub> :2.121 |
| 7  | OH <sub>2</sub> CCHO                 | -1.56                                                    | hcp <i>via</i> O         | 5.758                             | Cu - O: 2.054                                                                                                    |
| 8  | HOHCCHO                              | -0.80                                                    | bridge-CCO               | 5.009                             | Cu - O: 2.170; Cu - C : 2.218                                                                                    |
| 9  | OH <sub>2</sub> CCHOH                | -0.93                                                    | bridge-OCCO              | 5.473                             | Cu - C: 2.019; Cu - O: 2.044                                                                                     |
| 10 | OH <sub>2</sub> CCH <sub>2</sub> OH  | -1.90                                                    | hcp <i>via</i> O         | 6.085                             | Cu - O: 2.028                                                                                                    |
| 11 | HOH <sub>2</sub> CCH <sub>2</sub> OH | 0.57                                                     | no bond                  | 6.607                             | /                                                                                                                |
| 12 | CH <sub>2</sub> O                    | 0.39 (-0.06 <sup>ref50</sup> , -0.35 <sup>ref51</sup> )  | fcc <i>via</i> bridge-CO | 4.395                             | Cu - C: 2.167; Cu - O: 2.113                                                                                     |
| 13 | CHOH                                 | -1.27 (-1.85 <sup>ref50</sup> , -2.27 <sup>ref51</sup> ) | fcc <i>via</i> bridge-CO | 4.434                             | Cu - C: 1.961; Cu - O: 2.091                                                                                     |
| 14 | CH <sub>3</sub> O                    | -1.90 (-2.45 <sup>ref50</sup> , -3.04 <sup>ref51</sup> ) | fcc <i>via</i> O         | 5.644                             | Cu - O:2.010                                                                                                     |
| 15 | CH <sub>2</sub> OH                   | -1.07 (-0.84 <sup>ref50</sup> , -1.68 <sup>ref51</sup> ) | fcc <i>via</i> bridge-CO | 4.613                             | Cu - C: 2.132; Cu - O: 2.140                                                                                     |
| 16 | CH <sub>3</sub> OH                   | 0.73 (-0.28 <sup>ref50</sup> , -0.32 <sup>ref51</sup> )  | top <i>via</i> O         | 5.925                             | Cu - O: 2.233                                                                                                    |
| 17 | CH <sub>3</sub>                      | -1.72 (-2.24 <sup>ref52</sup> )                          | fcc <i>via</i> C         | 4.491                             | Cu - C: 2.163                                                                                                    |
| 18 | CH <sub>4</sub>                      | 1.13 (-0.05 <sup>ref52</sup> )                           | no bond                  | 5.646                             | /                                                                                                                |
| 19 | CH <sub>3</sub> CO                   | -0.72 (-1.88 <sup>ref52</sup> )                          | fcc <i>via</i> bridge-CO | 5.704                             | Cu - C: 2.132; Cu - O: 2.168                                                                                     |
| 20 | CH <sub>3</sub> CHO                  | 0.82 (-0.16 <sup>ref52</sup> )                           | no bond                  | 6.004                             | /                                                                                                                |
| 21 | CH <sub>3</sub> CH <sub>2</sub> O    | -1.85                                                    | fcc <i>via</i> O         | 6.221                             | Cu - O: 2.018                                                                                                    |
| 22 | CH <sub>3</sub> CHOH                 | -0.49                                                    | top <i>via</i> C         | 6.106                             | Cu - C: 2.084                                                                                                    |
| 23 | C <sub>2</sub> H <sub>5</sub> OH     | 0.93                                                     | no bond                  | 6.559                             | /                                                                                                                |
| 24 | CO <sub>2</sub>                      | 1.40 (-0.08 <sup>ref50</sup> )                           | bridge <i>via</i> C      | 4.869                             | Cu - C: 2.129                                                                                                    |
| 25 | H <sub>2</sub> O                     | 0.42 (-0.21 <sup>ref50</sup> , -0.24 <sup>ref51</sup> )  | bridge <i>via</i> O      | 4.618                             | /                                                                                                                |

**Table S2** Possible elementary reactions involved in syngas conversion at the interface of graphene/Cu(111) with the imaginary frequency of the transition state are tabulated.

|       | Reaction                                                                                    | $\nu/\text{cm}^{-1}$ |
|-------|---------------------------------------------------------------------------------------------|----------------------|
| (R1)  | $\text{CO} + \text{H} \rightarrow \text{CHO}$                                               | 697 <i>i</i>         |
| (R2)  | $\text{CO} + \text{H} \rightarrow \text{COH}$                                               | 1590 <i>i</i>        |
| (R3)  | $\text{CHO} + \text{H}(1) \rightarrow \text{CH}_2\text{O}$                                  | 1285 <i>i</i>        |
| (R4)  | $\text{CHO} + \text{H}(2) \rightarrow \text{CHOH}$                                          | 1266 <i>i</i>        |
| (R5)  | $\text{CHO} + \text{H}(1) \rightarrow \text{CH}_2 + \text{O}$                               | 348 <i>i</i>         |
| (R6)  | $\text{CHO} + \text{CHO} \rightarrow \text{OHCCHO}$                                         | 45 <i>i</i>          |
| (R7)  | $\text{CHO} + \text{CO} \rightarrow \text{OCCHO}$                                           | 357 <i>i</i>         |
| (R8)  | $\text{CHO} + \text{CO} \rightarrow \text{CH} + \text{CO}_2$                                | 372 <i>i</i>         |
| (R9)  | $\text{OHCCHO} + \text{H} \rightarrow \text{OH}_2\text{CCHO}$                               | 472 <i>i</i>         |
| (R10) | $\text{OHCCHO} + \text{H} \rightarrow \text{HOHCCHO}$                                       | 1187 <i>i</i>        |
| (R11) | $\text{OHCCHO} \rightarrow \text{OHCCH} + \text{O}$                                         | 207.7 <i>i</i>       |
| (R12) | $\text{OH}_2\text{CCHO} + \text{H} \rightarrow \text{OH}_2\text{CCHOH}$                     | 1329 <i>i</i>        |
| (R13) | $\text{OH}_2\text{CCHO} + \text{H} \rightarrow \text{OH}_2\text{CCH}_2\text{O}$             | 78 <i>i</i>          |
| (R14) | $\text{OH}_2\text{CCHOH} + \text{H} \rightarrow \text{OH}_2\text{CCH}_2\text{OH}$           | 1223 <i>i</i>        |
| (R15) | $\text{OH}_2\text{CCH}_2\text{OH} + \text{H} \rightarrow \text{HOH}_2\text{CCH}_2\text{OH}$ | 1222 <i>i</i>        |
| (R16) | $\text{OH}_2\text{CCH}_2\text{OH} \rightarrow \text{H}_2\text{CCH}_2\text{OH} + \text{O}$   | 376.3 <i>i</i>       |
| (R17) | $\text{CH}_2\text{O} + \text{H} \rightarrow \text{CH}_3\text{O}$                            | 390 <i>i</i>         |
| (R18) | $\text{CH}_2\text{O} + \text{H}(2) \rightarrow \text{CH}_2\text{OH}$                        | 1196 <i>i</i>        |
| (R19) | $\text{CH}_2\text{O} + \text{H}(1) \rightarrow \text{CH}_3 + \text{O}$                      | 837 <i>i</i>         |
| (R20) | $\text{CH}_2\text{O} \rightarrow \text{CH}_2 + \text{O}$                                    | 165 <i>i</i>         |
| (R21) | $\text{CH}_2\text{O} + \text{H}(2) \rightarrow \text{CH}_2 + \text{OH}$                     | 1094 <i>i</i>        |
| (R22) | $\text{CH}_3\text{O} + \text{H} \rightarrow \text{CH}_3 + \text{OH}$                        | 119 <i>i</i>         |
| (R23) | $\text{CH}_3\text{O} + \text{H} \rightarrow \text{CH}_3\text{OH}$                           | 1159 <i>i</i>        |
| (R24) | $\text{CH}_3\text{O} \rightarrow \text{CH}_3 + \text{O}$                                    | 241 <i>i</i>         |
| (R25) | $\text{CH}_3 + \text{H} \rightarrow \text{CH}_4$                                            | 91 <i>i</i>          |
| (R26) | $\text{CH}_3 + \text{CHO} \rightarrow \text{CH}_3\text{CHO}$                                | 442 <i>i</i>         |
| (R27) | $\text{CH}_3 \rightarrow \text{CH}_2 + \text{H}$                                            | 838 <i>i</i>         |
| (R28) | $\text{CH}_3 + \text{CO} \rightarrow \text{CH}_3\text{CO}$                                  | 517 <i>i</i>         |
| (R29) | $\text{CH}_3 + \text{CH}_3 \rightarrow \text{C}_2\text{H}_6$                                | 521 <i>i</i>         |
| (R30) | $\text{CH}_3\text{CHO} + \text{H} \rightarrow \text{CH}_3\text{CHOH}$                       | 1261 <i>i</i>        |
| (R31) | $\text{CH}_3\text{CHO} + \text{H} \rightarrow \text{CH}_3\text{CH}_2\text{O}$               | 1691 <i>i</i>        |
| (R32) | $\text{CH}_3\text{CHOH} + \text{H} \rightarrow \text{C}_2\text{H}_5\text{OH}$               | 350 <i>i</i>         |
| (R33) | $\text{CH}_3\text{CH}_2\text{O} + \text{H} \rightarrow \text{C}_2\text{H}_5\text{OH}$       | 1139 <i>i</i>        |
| (R34) | $\text{CO} + \text{O} \rightarrow \text{CO}_2$                                              | 369 <i>i</i>         |
| (R35) | $\text{OH} + \text{H} \rightarrow \text{H}_2\text{O}$                                       | 1345 <i>i</i>        |

**Table S3** The comparison of activation barriers ( $E_a$ /eV) and reaction energies ( $\Delta E$ /eV) of the key elementary reactions on the graphene/Cu(111), Cu(111), Cu(211) and Cu<sub>1</sub>/graphene catalysts .

| reaction | graphene/Cu(111)<br>(this work)                                        |           | Cu <sub>1</sub> /graphene<br>(Ref.15) |           | Cu(111)<br>(Ref.50) |           | Cu(111)<br>(Ref.51, Ref.52) |                         | Cu(211)<br>(ref.58)    |           |      |
|----------|------------------------------------------------------------------------|-----------|---------------------------------------|-----------|---------------------|-----------|-----------------------------|-------------------------|------------------------|-----------|------|
|          | $\Delta E$ /eV                                                         | $E_a$ /eV | $\Delta E$ /eV                        | $E_a$ /eV | $\Delta E$ /eV      | $E_a$ /eV | $\Delta E$ /eV              | $E_a$ /eV               | $\Delta E$ /eV         | $E_a$ /eV |      |
| R1       | CO+H→CHO                                                               | 0.55      | 1.03                                  | 0.96      | 1.16                | 0.78      | 0.99                        | 0.85                    | 1.10                   | 0.16      | 1.20 |
| R2       | CO+H→COH                                                               | 1.11      | 2.06                                  | 3.03      | /                   | 1.15      | 2.26                        | 1.01                    | 2.42                   | 0.87      | 2.87 |
| R3       | CHO+H→CHOH                                                             | 0.33      | 0.89                                  | -0.50     | 0.04                | 0.09      | 0.91                        | -0.04                   | 0.92                   | 0.35      | 1.43 |
| R4       | CHO+H→CH <sub>2</sub> O                                                | -0.20     | 0.37                                  | -0.22     | /                   | -0.40     | 0.47                        | -0.23                   | 0.52                   | -0.50     | 0.93 |
| R5       | CH <sub>2</sub> O+H→CH <sub>2</sub> OH                                 | -0.03     | 1.00                                  | -0.04     | 0.99                | -0.06     | 0.82                        | 0.04                    | 0.93                   | 0.28      | 1.37 |
| R6       | CH <sub>2</sub> O+H→CH <sub>3</sub> O                                  | -0.49     | 0.31                                  | -0.66     | 1.12                | -1.02     | 0.24                        | -0.91                   | 0.36                   | -0.62     | 1.46 |
| R7       | CH <sub>3</sub> O+H→CH <sub>3</sub> OH                                 | -0.01     | 1.38                                  | /         | /                   | -0.23     | 1.17                        | 0.16                    | 1.20                   | 0.20      | 2.02 |
| R8       | CHO+CHO→OHCCHO                                                         | -1.15     | 0.13                                  | -0.48     | 0.61                | /         | /                           | /                       | /                      | /         | /    |
| R9       | CHO+CO→OCCHO                                                           | 0.29      | 1.46                                  | -0.56     | 0.69                | /         | /                           | /                       | /                      | /         | /    |
| R10      | CH <sub>3</sub> +CHO→CH <sub>3</sub> CHO                               | -0.64     | 0.92                                  | -1.15     | 0.51                | /         | /                           | -1.04 <sup>ref.52</sup> | 0.51 <sup>ref.52</sup> | -0.94     | 0.91 |
| R11      | CH <sub>3</sub> +H→CH <sub>4</sub>                                     | -0.04     | 0.59                                  | -0.78     | 0.54                | /         | /                           | -0.67 <sup>ref.52</sup> | 0.80 <sup>ref.52</sup> | -0.23     | 1.34 |
| R12      | CH <sub>3</sub> CHO+H→CH <sub>3</sub> CHOH                             | 0.22      | 0.93                                  | 0.18      | 1.35                | /         | /                           | /                       | /                      | -0.12     | 2.73 |
| R13      | CH <sub>3</sub> CHO+H→CH <sub>3</sub> CH <sub>2</sub> O                | -0.66     | 2.45                                  | -0.68     | 0.60                | /         | /                           | /                       | /                      | -0.83     | 1.39 |
| R14      | CH <sub>3</sub> CHOH+H→CH <sub>3</sub> CH <sub>2</sub> OH              | -1.05     | 0.15                                  | -0.58     | 1.98                | /         | /                           | /                       | /                      | /         | /    |
| R15      | CH <sub>3</sub> CH <sub>2</sub> O+H→CH <sub>3</sub> CH <sub>2</sub> OH | -0.17     | 1.22                                  | 0.06      | 1.60                | /         | /                           | /                       | /                      | 0.23      | 1.93 |

**Fig. S2** The optimized configurations of (a) Cu(111) and (b) graphene/Cu(111), respectively. (Cu atom: pink, C atom : grey)

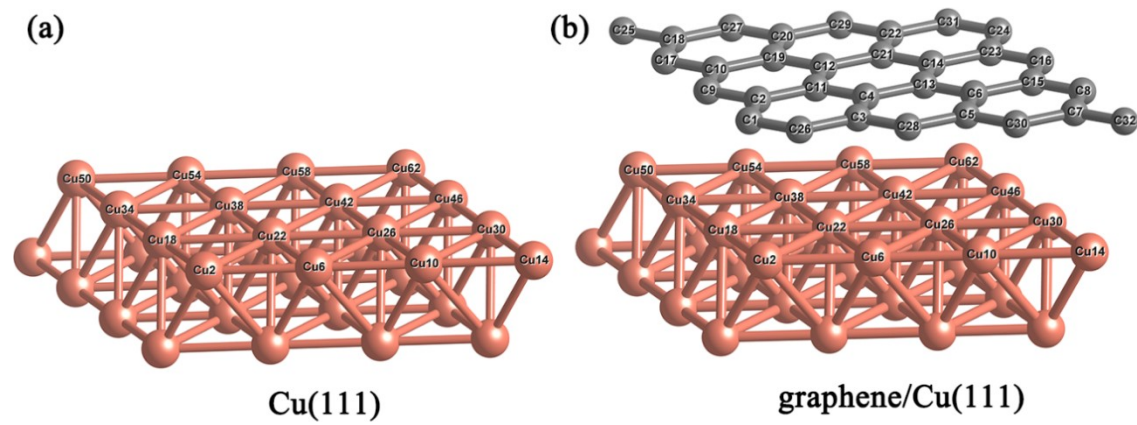

**Table S4** Comparison of Bader charge distribution between Cu(111) and graphene/Cu(111) based on the labelled atoms in Fig. S2.

| Aotm  | Bader charge |                  |
|-------|--------------|------------------|
|       | Cu(111)      | graphene/Cu(111) |
| Cu 2  | -0.0102      | -0.0190          |
| Cu 6  | -0.0106      | -0.0198          |
| Cu 10 | -0.0109      | -0.0208          |
| Cu 14 | -0.0100      | -0.0199          |
| Cu 18 | -0.0101      | -0.0194          |
| Cu 22 | -0.0101      | -0.0193          |
| Cu 26 | -0.0099      | -0.0199          |
| Cu 30 | -0.0107      | -0.0199          |
| Cu 34 | -0.0105      | -0.0195          |
| Cu 38 | -0.0107      | -0.0197          |
| Cu 42 | -0.0106      | -0.0203          |
| Cu 46 | -0.0099      | -0.0199          |
| Cu 50 | -0.0105      | -0.0192          |
| Cu 54 | -0.0102      | -0.0195          |
| Cu 58 | -0.0105      | -0.0194          |
| Cu 62 | -0.0099      | -0.0197          |
| C1    | \            | 0.0699           |
| C2    | \            | -0.0779          |
| C3    | \            | 0.0701           |
| C4    | \            | -0.0777          |
| C5    | \            | 0.0697           |
| C6    | \            | -0.0779          |
| C7    | \            | 0.0696           |
| C8    | \            | -0.0783          |
| C9    | \            | 0.0698           |
| C10   | \            | -0.0779          |
| C11   | \            | 0.0704           |
| C12   | \            | -0.0778          |
| C13   | \            | 0.0704           |
| C14   | \            | -0.0774          |
| C15   | \            | 0.0700           |
| C16   | \            | -0.0778          |
| C17   | \            | 0.0700           |
| C18   | \            | -0.0784          |
| C19   | \            | 0.0695           |
| C20   | \            | -0.0784          |
| C21   | \            | 0.0701           |
| C22   | \            | -0.0784          |



|     |   |         |
|-----|---|---------|
| C23 | \ | 0.0699  |
| C24 | \ | -0.0781 |
| C25 | \ | 0.0695  |
| C26 | \ | -0.0780 |
| C27 | \ | 0.0695  |
| C28 | \ | -0.0781 |
| C29 | \ | 0.0695  |
| C30 | \ | -0.0783 |
| C31 | \ | 0.0698  |
| C32 | \ | -0.0784 |

---

## References

---

- [1] P. Atkins, J. De Paula, Atkins' Physical Chemistry, 2006.
- [2] E.B. Wilson, J.C. Decius, P.C. Cross, Molecular Vibrations: The Theory of Infrared and Raman Vibrational Spectra, Dover Publications, 1980.
